# Supplementary material for: Inflammatory and tissue injury marker dynamics in pediatric acute respiratory distress syndrome
Source: PubMed Central journal article supplement (PMC11093602; doi:10.1172/jci177896), 2024-04-04
Supplement: jci-134-177896-s011.pdf [file jci-134-177896-s011.pdf]

```

*****DATA SETUP*****
drop if subject < 55
drop if subject==.
replace pf24h=50 if pf24h==.
replace oi24h=50 if oi24h==.
gen logvaso = log(vasopressorscore72h+1)
gen persistentards=.
replace persistentards=0 if d7ardsresolved0mild1mod2sev3<2 &
d7ardsresolved0mild1mod2sev3~=.
replace persistentards=1 if d7ardsresolved0mild1mod2sev3>=2 &
d7ardsresolved0mild1mod2sev3~=.
gen pfcats=.
replace pfcats=1 if pfinitial>200
replace pfcats=2 if pfinitial<201 & pfinitial>100
replace pfcats=3 if pfinitial<101
*****pg/mL to ng/mL*****
gen tnfr1ngmlday0= tnfr1pgml/1000
gen tnfr1ngmlday3= tnfr1t13d/1000
gen tnfr1ngmlday7= tnfr1t27d /1000
gen hspngmlday0= hsp70pgml /1000
gen hspngmlday3= hsp70t13d /1000
gen hspngmlday7= hsp70t27d /1000
gen mmpngmlday0= mmp8pgml /1000
gen mmpngmlday3= mmp8t13d /1000
gen mmpngmlday7= mmp8t27d /1000
*****LOG TRANSFORM*****
gen logang0=log( angpt2pgml+1)
gen logang3=log( angptt13d +1)
gen logang7=log( angptt27d +1)
gen lograge0=log( ragepgml+1)
gen lograge3=log( raget13d +1)
gen lograge7=log( raget27d +1)
gen lognucl0=log( nucleosomesnormalized+1)
gen lognucl3=log( nucleosomest1normalizedday3 +1)
gen lognucl7=log( nucleosomest2normalizedday7 +1)
gen logspd0=log( spdngml+1)
gen logspd3=log( spdt13d +1)
gen logspd7=log( spdt27d +1)
gen logp3np0=log( p3npngml+1)
gen logp3np3=log( p3npt13d +1)
gen logp3np7=log( p3npt27d +1)
gen logccl22d0=log( ccl22pgml+1)
gen logccl22d3=log( ccl22t13d +1)
gen logccl22d7=log( ccl22t27d +1)
gen logccl17d0=log( ccl17pgml +1)
gen logccl17d3=log( ccl17t13d +1)
gen logccl17d7=log( ccl17t27d +1)
gen logil6d0=log( il6pgml+1)
gen logil6d3=log( il6t13d +1)
gen logil6d7=log( il6t27d +1)
gen logtnfr10=log( tnfr1pgml+1)
gen logtnfr13=log( tnfr1t13d +1)
gen logtnfr17=log( tnfr1t27d +1)
gen loggzmb0=log( granzymebspngml+1)

```

```

gen loggzmb3=log( granzymebt13d +1)
gen loggzmb7=log( granzymebt27d +1)
gen loghsp0=log( hsp70pgml+1)
gen loghsp3=log( hsp70t13d +1)
gen loghsp7=log( hsp70t27d +1)
gen logilla0=log( illapgml+1)
gen logilla3=log( illat13d +1)
gen logilla7=log( illat27d +1)
gen logil8d0=log( il8pgml+1)
gen logil8d3=log( il8t13d +1)
gen logil8d7=log( il8t27d +1)
gen logmip1a0=log( ccl3mip1apgml+1)
gen logmip1a3=log( ccl3mip1at13d +1)
gen logmip1a7=log( ccl3mip1at27d +1)
gen logmilb0=log( mip1bpgml+1)
gen logmilb3=log( mip1bt13d +1)
gen logmilb7=log( mip1bt27d +1)
gen logmmp0=log( mmp8pgml+1)
gen logmmp3=log( mmp8t13d +1)
gen logmmp7=log( mmp8t27d +1)
gen logcoxi0=log( hcoxicopiesul)
gen logcoxi3=log( hcoxiday3 )
gen logcoxi7=log( hcoxiday7 )
gen lognd0=log( nd1copiesul )
gen lognd3=log( nd1day3 )
gen lognd7=log( nd1day7 )
gen logcoxiv0=log( hcox4copiesul )
gen logcoxiv3=log( hcox4day3 )
gen logcoxiv7=log( hcox4day7 )
*****DEATHS ON DAYS 0, 3, 7*****
set pformat %5.4f
regress logilla0 agey i.dxcodedp0s1a2o3 immunosuppressed pfinitial
picudeath
regress logil6d0 agey i.dxcodedp0s1a2o3 immunosuppressed pfinitial
picudeath
regress logil8d0 agey i.dxcodedp0s1a2o3 immunosuppressed pfinitial
picudeath
regress logtnfr10 agey i.dxcodedp0s1a2o3 immunosuppressed pfinitial
picudeath
regress logmmp0 agey i.dxcodedp0s1a2o3 immunosuppressed pfinitial
picudeath
regress loggzmb0 agey i.dxcodedp0s1a2o3 immunosuppressed pfinitial
picudeath
regress logccl17d0 agey i.dxcodedp0s1a2o3 immunosuppressed pfinitial
picudeath
regress logccl22d0 agey i.dxcodedp0s1a2o3 immunosuppressed pfinitial
picudeath
regress logmip1a0 agey i.dxcodedp0s1a2o3 immunosuppressed pfinitial
picudeath
regress logmilb0 agey i.dxcodedp0s1a2o3 immunosuppressed pfinitial
picudeath
regress logang0 agey i.dxcodedp0s1a2o3 immunosuppressed pfinitial
picudeath

```

```
regress logp3np0 agey i.dxcodedp0s1a2o3 immunosuppressed pfinitial
picudeath
regress lograge0 agey i.dxcodedp0s1a2o3 immunosuppressed pfinitial
picudeath
parmest, list(p) format(p %-8.2g)
regress logspd0 agey i.dxcodedp0s1a2o3 immunosuppressed pfinitial
picudeath
regress loghsp0 agey i.dxcodedp0s1a2o3 immunosuppressed pfinitial
picudeath
parmest, list(p) format(p %-8.2g)
regress lognucl0 agey i.dxcodedp0s1a2o3 immunosuppressed pfinitial
picudeath
parmest, list(p) format(p %-8.2g)
regress logcoxiv0 agey i.dxcodedp0s1a2o3 immunosuppressed pfinitial
picudeath
parmest, list(p) format(p %-8.2g)
regress logcoxi0 agey i.dxcodedp0s1a2o3 immunosuppressed pfinitial
picudeath
regress lognd0 agey i.dxcodedp0s1a2o3 immunosuppressed pfinitial
picudeath
regress logilla3 agey i.dxcodedp0s1a2o3 immunosuppressed pfinitial
picudeath
regress logil6d3 agey i.dxcodedp0s1a2o3 immunosuppressed pfinitial
picudeath
regress logil8d3 agey i.dxcodedp0s1a2o3 immunosuppressed pfinitial
picudeath
parmest, list(p) format(p %-8.2g)
regress logtnfrl3 agey i.dxcodedp0s1a2o3 immunosuppressed pfinitial
picudeath
parmest, list(p) format(p %-8.2g)
regress logmmp3 agey i.dxcodedp0s1a2o3 immunosuppressed pfinitial
picudeath
regress loggzmb3 agey i.dxcodedp0s1a2o3 immunosuppressed pfinitial
picudeath
regress logccl17d3 agey i.dxcodedp0s1a2o3 immunosuppressed pfinitial
picudeath
regress logccl22d3 agey i.dxcodedp0s1a2o3 immunosuppressed pfinitial
picudeath
regress logmip1a3 agey i.dxcodedp0s1a2o3 immunosuppressed pfinitial
picudeath
regress logmilb3 agey i.dxcodedp0s1a2o3 immunosuppressed pfinitial
picudeath
regress logang3 agey i.dxcodedp0s1a2o3 immunosuppressed pfinitial
picudeath
regress logp3np3 agey i.dxcodedp0s1a2o3 immunosuppressed pfinitial
picudeath
regress lograge3 agey i.dxcodedp0s1a2o3 immunosuppressed pfinitial
picudeath
parmest, list(p) format(p %-8.2g)
regress logspd3 agey i.dxcodedp0s1a2o3 immunosuppressed pfinitial
picudeath
regress loghsp3 agey i.dxcodedp0s1a2o3 immunosuppressed pfinitial
picudeath
parmest, list(p) format(p %-8.2g)
```

```
regress lognucl3 agey i.dxcodedp0s1a2o3 immunosuppressed pfinitial
picudeath
parmest, list(p) format(p %-8.2g)
regress logcoxiv3 agey i.dxcodedp0s1a2o3 immunosuppressed pfinitial
picudeath
parmest, list(p) format(p %-8.2g)
regress logcoxii3 agey i.dxcodedp0s1a2o3 immunosuppressed pfinitial
picudeath
regress lognd3 agey i.dxcodedp0s1a2o3 immunosuppressed pfinitial
picudeath
regress logilla7 agey i.dxcodedp0s1a2o3 immunosuppressed pfinitial
picudeath
regress logil6d7 agey i.dxcodedp0s1a2o3 immunosuppressed pfinitial
picudeath
regress logil8d7 agey i.dxcodedp0s1a2o3 immunosuppressed pfinitial
picudeath
parmest, list(p) format(p %-8.2g)
regress logtnfr17 agey i.dxcodedp0s1a2o3 immunosuppressed pfinitial
picudeath
parmest, list(p) format(p %-8.2g)
regress logmmp7 agey i.dxcodedp0s1a2o3 immunosuppressed pfinitial
picudeath
regress loggzmb7 agey i.dxcodedp0s1a2o3 immunosuppressed pfinitial
picudeath
regress logccl17d7 agey i.dxcodedp0s1a2o3 immunosuppressed pfinitial
picudeath
regress logccl22d7 agey i.dxcodedp0s1a2o3 immunosuppressed pfinitial
picudeath
regress logmip1a7 agey i.dxcodedp0s1a2o3 immunosuppressed pfinitial
picudeath
regress logmilb7 agey i.dxcodedp0s1a2o3 immunosuppressed pfinitial
picudeath
regress logang7 agey i.dxcodedp0s1a2o3 immunosuppressed pfinitial
picudeath
regress logp3np7 agey i.dxcodedp0s1a2o3 immunosuppressed pfinitial
picudeath
regress lograge7 agey i.dxcodedp0s1a2o3 immunosuppressed pfinitial
picudeath
parmest, list(p) format(p %-8.2g)
regress logspd7 agey i.dxcodedp0s1a2o3 immunosuppressed pfinitial
picudeath
regress loghsp7 agey i.dxcodedp0s1a2o3 immunosuppressed pfinitial
picudeath
parmest, list(p) format(p %-8.2g)
regress lognucl7 agey i.dxcodedp0s1a2o3 immunosuppressed pfinitial
picudeath
regress logcoxiv7 agey i.dxcodedp0s1a2o3 immunosuppressed pfinitial
picudeath
parmest, list(p) format(p %-8.2g)
regress logcoxii7 agey i.dxcodedp0s1a2o3 immunosuppressed pfinitial
picudeath
regress lognd7 agey i.dxcodedp0s1a2o3 immunosuppressed pfinitial
picudeath
*****STANDARDIZE*****
```

egen zlogang0=std( logang0 )  
egen zlogang3=std( logang3 )  
egen zlogang7=std( logang7 )  
egen zlograge0=std( lograge0 )  
egen zlograge3=std( lograge3 )  
egen zlograge7=std( lograge7 )  
egen zlognucl0=std( lognucl0 )  
egen zlognucl3=std( lognucl3 )  
egen zlognucl7=std( lognucl7 )  
egen zlogspd0=std( logspd0 )  
egen zlogspd3=std( logspd3 )  
egen zlogspd7=std( logspd7 )  
egen zlogp3np0=std( logp3np0 )  
egen zlogp3np3=std( logp3np3 )  
egen zlogp3np7=std( logp3np7 )  
egen zlogccl22d0=std( logccl22d0 )  
egen zlogccl22d3=std( logccl22d3 )  
egen zlogccl22d7=std( logccl22d7 )  
egen zlogccl17d0=std( logccl17d0 )  
egen zlogccl17d3=std( logccl17d3 )  
egen zlogccl17d7=std( logccl17d7 )  
egen zlogil6d0=std( logil6d0 )  
egen zlogil6d3=std( logil6d3 )  
egen zlogil6d7=std( logil6d7 )  
egen zlogtnfr10=std( logtnfr10 )  
egen zlogtnfr13=std( logtnfr13 )  
egen zlogtnfr17=std( logtnfr17 )  
egen zloggzm0=std( loggzmb0 )  
egen zloggzm3=std( loggzmb3 )  
egen zloggzm7=std( loggzmb7 )  
egen zloghsp0=std( loghsp0 )  
egen zloghsp3=std( loghsp3 )  
egen zloghsp7=std( loghsp7 )  
egen zlogilla0=std( logilla0 )  
egen zlogilla3=std( logilla3 )  
egen zlogilla7=std( logilla7 )  
egen zlogil8d0=std( logil8d0 )  
egen zlogil8d3=std( logil8d3 )  
egen zlogil8d7=std( logil8d7 )  
egen zlogmipla0=std( logmipla0 )  
egen zlogmipla3=std( logmipla3 )  
egen zlogmipla7=std( logmipla7 )  
egen zlogmip1b0=std( logmilb0 )  
egen zlogmip1b3=std( logmilb3 )  
egen zlogmip1b7=std( logmilb7 )  
egen zlogmmp0=std( logmmp0 )  
egen zlogmmp3=std( logmmp3 )  
egen zlogmmp7=std( logmmp7 )  
egen zlogcoxi0=std( logcoxi0 )  
egen zlogcoxi3=std( logcoxi3 )  
egen zlogcoxi7=std( logcoxi7 )  
egen zlognd0=std( lognd0 )  
egen zlognd3=std( lognd3 )  
egen zlognd7=std( lognd7 )

```

egen zlogcoxiv0=std( logcoxiv0 )
egen zlogcoxiv3=std( logcoxiv3 )
egen zlogcoxiv7=std( logcoxiv7 )
*****RESHAPE*****
preserve
reshape long zlogilla zlogil6d zlogil8d zlogtnfr1 zlogmmp zloggzm
zlogccl7d zlogccl22d zlogmipla zlogmip1b zlogang zlogp3np zlograge
zlogspd zloghsp zlognucl zlogcoxiv zlogcoxi zlognd logilla logil6d
logil8d logtnfr1 logmmp loggzmb logccl7d logccl22d logmipla logmip1b
logang logp3np lograge logspd loghsp lognucl logcoxiv logcoxi lognd,
i(subject)
*****REGRESS DEATH*****
mixed zlogilla agey i.dxcodedp0s1a2o3 immunosuppressed pfinitial
picudeath##c._j || subject:
mixed zlogil6 agey i.dxcodedp0s1a2o3 immunosuppressed pfinitial
picudeath##c._j || subject:
mixed zlogil8 agey i.dxcodedp0s1a2o3 immunosuppressed pfinitial
picudeath##c._j || subject:
mixed zlogtnfr1 agey i.dxcodedp0s1a2o3 immunosuppressed pfinitial
picudeath##c._j || subject:
mixed zlogmmp agey i.dxcodedp0s1a2o3 immunosuppressed pfinitial
picudeath##c._j || subject:
mixed zloggzm agey i.dxcodedp0s1a2o3 immunosuppressed pfinitial
picudeath##c._j || subject:
mixed zlogccl7d agey i.dxcodedp0s1a2o3 immunosuppressed pfinitial
picudeath##c._j || subject:
mixed zlogccl22d agey i.dxcodedp0s1a2o3 immunosuppressed pfinitial
picudeath##c._j || subject:
mixed zlogmipla agey i.dxcodedp0s1a2o3 immunosuppressed pfinitial
picudeath##c._j || subject:
mixed zlogmip1b agey i.dxcodedp0s1a2o3 immunosuppressed pfinitial
picudeath##c._j || subject:
mixed zlogang agey i.dxcodedp0s1a2o3 immunosuppressed pfinitial
picudeath##c._j || subject:
mixed zlogp3np agey i.dxcodedp0s1a2o3 immunosuppressed pfinitial
picudeath##c._j || subject:
mixed zlograge agey i.dxcodedp0s1a2o3 immunosuppressed pfinitial
picudeath##c._j || subject:
mixed zlogspd agey i.dxcodedp0s1a2o3 immunosuppressed pfinitial
picudeath##c._j || subject:
mixed zloghsp agey i.dxcodedp0s1a2o3 immunosuppressed pfinitial
picudeath##c._j || subject:
mixed zlognucl agey i.dxcodedp0s1a2o3 immunosuppressed pfinitial
picudeath##c._j || subject:
mixed zlogcoxiv agey i.dxcodedp0s1a2o3 immunosuppressed pfinitial
picudeath##c._j || subject:
mixed zlogcoxi agey i.dxcodedp0s1a2o3 immunosuppressed pfinitial
picudeath##c._j || subject:
mixed zlognd agey i.dxcodedp0s1a2o3 immunosuppressed pfinitial
picudeath##c._j || subject:
*****REGRESS DIRECT*****
mixed zlogilla agey immunosuppressed pfinitial direct0##c._j || subject:
mixed zlogil6 agey immunosuppressed pfinitial direct0##c._j || subject:
mixed zlogil8 agey immunosuppressed pfinitial direct0##c._j || subject:

```

```
mixed zlogtnfr1 agey immunosuppressed pfinitial direct0##c._j ||
subject:
mixed zlogmmp agey immunosuppressed pfinitial direct0##c._j || subject:
mixed zloggzm agey immunosuppressed pfinitial direct0##c._j || subject:
mixed zlogccl7d agey immunosuppressed pfinitial direct0##c._j ||
subject:
mixed zlogccl22d agey immunosuppressed pfinitial direct0##c._j ||
subject:
mixed zlogmip1a agey immunosuppressed pfinitial direct0##c._j ||
subject:
mixed zlogmip1b agey immunosuppressed pfinitial direct0##c._j ||
subject:
mixed zlogang agey immunosuppressed pfinitial direct0##c._j || subject:
mixed zlogp3np agey immunosuppressed pfinitial direct0##c._j || subject:
mixed zlograge agey immunosuppressed pfinitial direct0##c._j || subject:
mixed zlogspd agey immunosuppressed pfinitial direct0##c._j || subject:
mixed zloghsp agey immunosuppressed pfinitial direct0##c._j || subject:
mixed zlognucl agey immunosuppressed pfinitial direct0##c._j || subject:
mixed zlogcoxiv agey immunosuppressed pfinitial direct0##c._j ||
subject:
mixed zlogcoxi agey immunosuppressed pfinitial direct0##c._j || subject:
mixed zlognd agey immunosuppressed pfinitial direct0##c._j || subject:
*****REGRESS PERSISTENT ARDS*****
mixed zlogilla agey i.dxcodedp0s1a2o3 immunosuppressed pfinitial
persistentards##c._j || subject:
mixed zlogil6 agey i.dxcodedp0s1a2o3 immunosuppressed pfinitial
persistentards##c._j || subject:
mixed zlogil8 agey i.dxcodedp0s1a2o3 immunosuppressed pfinitial
persistentards##c._j || subject:
mixed zlogtnfr1 agey i.dxcodedp0s1a2o3 immunosuppressed pfinitial
persistentards##c._j || subject:
mixed zlogmmp agey i.dxcodedp0s1a2o3 immunosuppressed pfinitial
persistentards##c._j || subject:
mixed zloggzm agey i.dxcodedp0s1a2o3 immunosuppressed pfinitial
persistentards##c._j || subject:
mixed zlogccl7d agey i.dxcodedp0s1a2o3 immunosuppressed pfinitial
persistentards##c._j || subject:
mixed zlogccl22d agey i.dxcodedp0s1a2o3 immunosuppressed pfinitial
persistentards##c._j || subject:
mixed zlogmip1a agey i.dxcodedp0s1a2o3 immunosuppressed pfinitial
persistentards##c._j || subject:
mixed zlogmip1b agey i.dxcodedp0s1a2o3 immunosuppressed pfinitial
persistentards##c._j || subject:
mixed zlogang agey i.dxcodedp0s1a2o3 immunosuppressed pfinitial
persistentards##c._j || subject:
mixed zlogp3np agey i.dxcodedp0s1a2o3 immunosuppressed pfinitial
persistentards##c._j || subject:
mixed zlograge agey i.dxcodedp0s1a2o3 immunosuppressed pfinitial
persistentards##c._j || subject:
mixed zlogspd agey i.dxcodedp0s1a2o3 immunosuppressed pfinitial
persistentards##c._j || subject:
mixed zloghsp agey i.dxcodedp0s1a2o3 immunosuppressed pfinitial
persistentards##c._j || subject:
```

```
mixed zlognucl agey i.dxcodedp0s1a2o3 immunosuppresed pfinitial
persistentards##c._j || subject:
mixed zlogcoxiv agey i.dxcodedp0s1a2o3 immunosuppresed pfinitial
persistentards##c._j || subject:
mixed zlogcoxi agey i.dxcodedp0s1a2o3 immunosuppresed pfinitial
persistentards##c._j || subject:
mixed zlognd agey i.dxcodedp0s1a2o3 immunosuppresed pfinitial
persistentards##c._j || subject:
*****REGRESS MODS*****
mixed zlogilla agey i.dxcodedp0s1a2o3 immunosuppresed pfinitial
modsd7##c._j || subject:
mixed zlogil6 agey i.dxcodedp0s1a2o3 immunosuppresed pfinitial
modsd7##c._j || subject:
mixed zlogil8 agey i.dxcodedp0s1a2o3 immunosuppresed pfinitial
modsd7##c._j || subject:
mixed zlogtnfr1 agey i.dxcodedp0s1a2o3 immunosuppresed pfinitial
modsd7##c._j || subject:
mixed zlogmmp agey i.dxcodedp0s1a2o3 immunosuppresed pfinitial
modsd7##c._j || subject:
mixed zloggzmb agey i.dxcodedp0s1a2o3 immunosuppresed pfinitial
modsd7##c._j || subject:
mixed zlogccl7d agey i.dxcodedp0s1a2o3 immunosuppresed pfinitial
modsd7##c._j || subject:
mixed zlogccl22d agey i.dxcodedp0s1a2o3 immunosuppresed pfinitial
modsd7##c._j || subject:
mixed zlogmip1a agey i.dxcodedp0s1a2o3 immunosuppresed pfinitial
modsd7##c._j || subject:
mixed zlogmip1b agey i.dxcodedp0s1a2o3 immunosuppresed pfinitial
modsd7##c._j || subject:
mixed zlogang agey i.dxcodedp0s1a2o3 immunosuppresed pfinitial
modsd7##c._j || subject:
mixed zlogp3np agey i.dxcodedp0s1a2o3 immunosuppresed pfinitial
modsd7##c._j || subject:
mixed zlograge agey i.dxcodedp0s1a2o3 immunosuppresed pfinitial
modsd7##c._j || subject:
mixed zlogspd agey i.dxcodedp0s1a2o3 immunosuppresed pfinitial
modsd7##c._j || subject:
mixed zloghsp agey i.dxcodedp0s1a2o3 immunosuppresed pfinitial
modsd7##c._j || subject:
mixed zlognucl agey i.dxcodedp0s1a2o3 immunosuppresed pfinitial
modsd7##c._j || subject:
mixed zlogcoxiv agey i.dxcodedp0s1a2o3 immunosuppresed pfinitial
modsd7##c._j || subject:
mixed zlogcoxi agey i.dxcodedp0s1a2o3 immunosuppresed pfinitial
modsd7##c._j || subject:
mixed zlognd agey i.dxcodedp0s1a2o3 immunosuppresed pfinitial
modsd7##c._j || subject:
*****REGRESS ICC*****
mixed zlogilla agey i.dxcodedp0s1a2o3 pfinitial immunosuppresed##c._j
|| subject:
mixed zlogil6 agey i.dxcodedp0s1a2o3 pfinitial immunosuppresed##c._j ||
subject:
mixed zlogtnfr1 agey i.dxcodedp0s1a2o3 pfinitial immunosuppresed##c._j
|| subject:
```



```
mixed zlogmmp agey i.dxcodedp0s1a2o3 pfinitial immunosuppresed##c._j ||
subject:
mixed zloggzm agey i.dxcodedp0s1a2o3 pfinitial immunosuppresed##c._j ||
subject:
mixed zlogil8 agey i.dxcodedp0s1a2o3 pfinitial immunosuppresed##c._j ||
subject:
mixed zlogccl7d agey i.dxcodedp0s1a2o3 pfinitial immunosuppresed##c._j
|| subject:
mixed zlogccl22d agey i.dxcodedp0s1a2o3 pfinitial immunosuppresed##c._j
|| subject:
mixed zlogmip1a agey i.dxcodedp0s1a2o3 pfinitial immunosuppresed##c._j
|| subject:
mixed zlogmip1b agey i.dxcodedp0s1a2o3 pfinitial immunosuppresed##c._j
|| subject:
mixed zlogang agey i.dxcodedp0s1a2o3 pfinitial immunosuppresed##c._j ||
subject:
mixed zlogp3np agey i.dxcodedp0s1a2o3 pfinitial immunosuppresed##c._j ||
subject:
mixed zlograge agey i.dxcodedp0s1a2o3 pfinitial immunosuppresed##c._j ||
subject:
mixed zlogspd agey i.dxcodedp0s1a2o3 pfinitial immunosuppresed##c._j ||
subject:
mixed zloghsp agey i.dxcodedp0s1a2o3 pfinitial immunosuppresed##c._j ||
subject:
mixed zlognucl agey i.dxcodedp0s1a2o3 pfinitial immunosuppresed##c._j ||
subject:
mixed zlogcoxiv agey i.dxcodedp0s1a2o3 pfinitial immunosuppresed##c._j
|| subject:
mixed zlogcoxi agey i.dxcodedp0s1a2o3 pfinitial immunosuppresed##c._j ||
subject:
mixed zlognd agey i.dxcodedp0s1a2o3 pfinitial immunosuppresed##c._j ||
subject:
*****REGRESS STEROIDS*****
mixed zlogilla agey i.dxcodedp0s1a2o3 immunosuppresed pfinitial
steroidsyn##c._j || subject:
mixed zlogil6 agey i.dxcodedp0s1a2o3 immunosuppresed pfinitial
steroidsyn##c._j || subject:
mixed zlogtnfr1 agey i.dxcodedp0s1a2o3 immunosuppresed pfinitial
steroidsyn##c._j || subject:
mixed zlogmmp agey i.dxcodedp0s1a2o3 immunosuppresed pfinitial
steroidsyn##c._j || subject:
mixed zloggzm agey i.dxcodedp0s1a2o3 immunosuppresed pfinitial
steroidsyn##c._j || subject:
mixed zlogil8 agey i.dxcodedp0s1a2o3 immunosuppresed pfinitial
steroidsyn##c._j || subject:
mixed zlogccl7d agey i.dxcodedp0s1a2o3 immunosuppresed pfinitial
steroidsyn##c._j || subject:
mixed zlogccl22d agey i.dxcodedp0s1a2o3 immunosuppresed pfinitial
steroidsyn##c._j || subject:
mixed zlogmip1a agey i.dxcodedp0s1a2o3 immunosuppresed pfinitial
steroidsyn##c._j || subject:
mixed zlogmip1b agey i.dxcodedp0s1a2o3 immunosuppresed pfinitial
steroidsyn##c._j || subject:
```

```
mixed zlogang agey i.dxcodedp0s1a2o3 immunosuppresed pfinitial
steroidsyn##c._j || subject:
mixed zlogp3np agey i.dxcodedp0s1a2o3 immunosuppresed pfinitial
steroidsyn##c._j || subject:
mixed zlograge agey i.dxcodedp0s1a2o3 immunosuppresed pfinitial
steroidsyn##c._j || subject:
mixed zlogspd agey i.dxcodedp0s1a2o3 immunosuppresed pfinitial
steroidsyn##c._j || subject:
mixed zloghsp agey i.dxcodedp0s1a2o3 immunosuppresed pfinitial
steroidsyn##c._j || subject:
mixed zlognucl agey i.dxcodedp0s1a2o3 immunosuppresed pfinitial
steroidsyn##c._j || subject:
mixed zlogcoxiv agey i.dxcodedp0s1a2o3 immunosuppresed pfinitial
steroidsyn##c._j || subject:
mixed zlogcoxi agey i.dxcodedp0s1a2o3 immunosuppresed pfinitial
steroidsyn##c._j || subject:
mixed zlognd agey i.dxcodedp0s1a2o3 immunosuppresed pfinitial
steroidsyn##c._j || subject:
*****REGRESS ICC MORTALITY*****
mixed zlogilla agey i.dxcodedp0s1a2o3 pfinitial picudeath##c._j if
immunosuppresed==0 || subject:
mixed zlogil6 agey i.dxcodedp0s1a2o3 pfinitial picudeath##c._j if
immunosuppresed==0 || subject:
mixed zlogtnfr1 agey i.dxcodedp0s1a2o3 pfinitial picudeath##c._j if
immunosuppresed==0 || subject:
mixed zlogmmp agey i.dxcodedp0s1a2o3 pfinitial picudeath##c._j if
immunosuppresed==0 || subject:
mixed zloggzmb agey i.dxcodedp0s1a2o3 pfinitial picudeath##c._j if
immunosuppresed==0 || subject:
mixed zlogil8 agey i.dxcodedp0s1a2o3 pfinitial picudeath##c._j if
immunosuppresed==0 || subject:
mixed zlogccl7d agey i.dxcodedp0s1a2o3 pfinitial picudeath##c._j if
immunosuppresed==0 || subject:
mixed zlogccl22d agey i.dxcodedp0s1a2o3 pfinitial picudeath##c._j if
immunosuppresed==0 || subject:
mixed zlogmipla agey i.dxcodedp0s1a2o3 pfinitial picudeath##c._j if
immunosuppresed==0 || subject:
mixed zlogmiplb agey i.dxcodedp0s1a2o3 pfinitial picudeath##c._j if
immunosuppresed==0 || subject:
mixed zlogang agey i.dxcodedp0s1a2o3 pfinitial picudeath##c._j if
immunosuppresed==0 || subject:
mixed zlogp3np agey i.dxcodedp0s1a2o3 pfinitial picudeath##c._j if
immunosuppresed==0 || subject:
mixed zlograge agey i.dxcodedp0s1a2o3 pfinitial picudeath##c._j if
immunosuppresed==0 || subject:
mixed zlogspd agey i.dxcodedp0s1a2o3 pfinitial picudeath##c._j if
immunosuppresed==0 || subject:
mixed zloghsp agey i.dxcodedp0s1a2o3 pfinitial picudeath##c._j if
immunosuppresed==0 || subject:
mixed zlognucl agey i.dxcodedp0s1a2o3 pfinitial picudeath##c._j if
immunosuppresed==0 || subject:
mixed zlogcoxiv agey i.dxcodedp0s1a2o3 pfinitial picudeath##c._j if
immunosuppresed==0 || subject:
```

```

mixed zlogcoxi agey i.dxcodedp0s1a2o3 pfinitial picudeath##c._j if
immunosuppresed==0 || subject:
mixed zlognd agey i.dxcodedp0s1a2o3 pfinitial picudeath##c._j if
immunosuppresed==0 || subject:
mixed zlogilla agey i.dxcodedp0s1a2o3 pfinitial picudeath##c._j if
immunosuppresed==1 || subject:
mixed zlogil6 agey i.dxcodedp0s1a2o3 pfinitial picudeath##c._j if
immunosuppresed==1 || subject:
mixed zlogtnfr1 agey i.dxcodedp0s1a2o3 pfinitial picudeath##c._j if
immunosuppresed==1 || subject:
mixed zlogmmp agey i.dxcodedp0s1a2o3 pfinitial picudeath##c._j if
immunosuppresed==1 || subject:
mixed zloggzmb agey i.dxcodedp0s1a2o3 pfinitial picudeath##c._j if
immunosuppresed==1 || subject:
mixed zlogil8 agey i.dxcodedp0s1a2o3 pfinitial picudeath##c._j if
immunosuppresed==1 || subject:
mixed zlogccl7d agey i.dxcodedp0s1a2o3 pfinitial picudeath##c._j if
immunosuppresed==1 || subject:
mixed zlogccl22d agey i.dxcodedp0s1a2o3 pfinitial picudeath##c._j if
immunosuppresed==1 || subject:
mixed zlogmip1a agey i.dxcodedp0s1a2o3 pfinitial picudeath##c._j if
immunosuppresed==1 || subject:
mixed zlogmip1b agey i.dxcodedp0s1a2o3 pfinitial picudeath##c._j if
immunosuppresed==1 || subject:
mixed zlogang agey i.dxcodedp0s1a2o3 pfinitial picudeath##c._j if
immunosuppresed==1 || subject:
mixed zlogp3np agey i.dxcodedp0s1a2o3 pfinitial picudeath##c._j if
immunosuppresed==1 || subject:
mixed zlograge agey i.dxcodedp0s1a2o3 pfinitial picudeath##c._j if
immunosuppresed==1 || subject:
mixed zlogspd agey i.dxcodedp0s1a2o3 pfinitial picudeath##c._j if
immunosuppresed==1 || subject:
mixed zloghsp agey i.dxcodedp0s1a2o3 pfinitial picudeath##c._j if
immunosuppresed==1 || subject:
mixed zlognucl agey i.dxcodedp0s1a2o3 pfinitial picudeath##c._j if
immunosuppresed==1 || subject:
mixed zlogcoxiv agey i.dxcodedp0s1a2o3 pfinitial picudeath##c._j if
immunosuppresed==1 || subject:
mixed zlogcoxi agey i.dxcodedp0s1a2o3 pfinitial picudeath##c._j if
immunosuppresed==1 || subject:
mixed zlognd agey i.dxcodedp0s1a2o3 pfinitial picudeath##c._j if
immunosuppresed==1 || subject:
*****REGRESS STEROID MORTALITY*****
mixed zlogilla agey i.dxcodedp0s1a2o3 immunosuppresed pfinitial
picudeath##c._j if steroidsyn==0 || subject:
mixed zlogil6 agey i.dxcodedp0s1a2o3 immunosuppresed pfinitial
picudeath##c._j if steroidsyn==0 || subject:
mixed zlogtnfr1 agey i.dxcodedp0s1a2o3 immunosuppresed pfinitial
picudeath##c._j if steroidsyn==0 || subject:
mixed zlogmmp agey i.dxcodedp0s1a2o3 immunosuppresed pfinitial
picudeath##c._j if steroidsyn==0 || subject:
mixed zloggzmb agey i.dxcodedp0s1a2o3 immunosuppresed pfinitial
picudeath##c._j if steroidsyn==0 || subject:

```



```
mixed zlogspd agey i.dxcodedp0s1a2o3 immunosuppresed pfinitial
picudeath##c._j if steroidsyn==1 || subject:
mixed zloghsp agey i.dxcodedp0s1a2o3 immunosuppresed pfinitial
picudeath##c._j if steroidsyn==1 || subject:
mixed zlognucl agey i.dxcodedp0s1a2o3 immunosuppresed pfinitial
picudeath##c._j if steroidsyn==1 || subject:
mixed zlogcoxiv agey i.dxcodedp0s1a2o3 immunosuppresed pfinitial
picudeath##c._j if steroidsyn==1 || subject:
mixed zlogcoxi agey i.dxcodedp0s1a2o3 immunosuppresed pfinitial
picudeath##c._j if steroidsyn==1 || subject:
mixed zlognd agey i.dxcodedp0s1a2o3 immunosuppresed pfinitial
picudeath##c._j if steroidsyn==1 || subject:
```
